# Supplementary material
Source: publisher figshare collection journal article supplement (https://acs.figshare.com/ndownloader/files/12447749)
Supplement: Supplementary file 1 [file 12447749]

**Supporting information for:**  
**Accurate Quantum Mechanics/Molecular**  
**Mechanics Simulation of Aqueous Solutions with**  
**Tailored Molecular Mechanics Models**

Tao Jiang,<sup>\*,†</sup> Stanislav Simko,<sup>‡</sup> and Rosa E. Bulo<sup>‡</sup>

<sup>†</sup>*Laboratoire de chimie, École Normale Supérieure de lyon, 46 allée d’italie, 69007 Lyon,  
France*

<sup>‡</sup>*Inorganic Chemistry and Catalysis group, Debye Institute for Nanomaterials Science,  
Utrecht University, Universiteitsweg 99, 3584 CG Utrecht, The Netherlands*

E-mail: Tao.jiang@ens-lyon.fr

## 1 Methanol in water

The PM6-DH+ / PM6-DH+-EFF simulations of MeOH in water result in the C-O radial distribution in S1. The first solvation peak is in perfect agreement with the peak location observed in two different ab initio simulations.<sup>S1,S2</sup> We do observe a discrepancy in the second solvation peak (5.5 Å), which is found at a smaller distance than in the HF simulations (6.5 Å).<sup>S1</sup> The DFT results<sup>S2</sup> do not contain the second peak within the limited simulation cell.

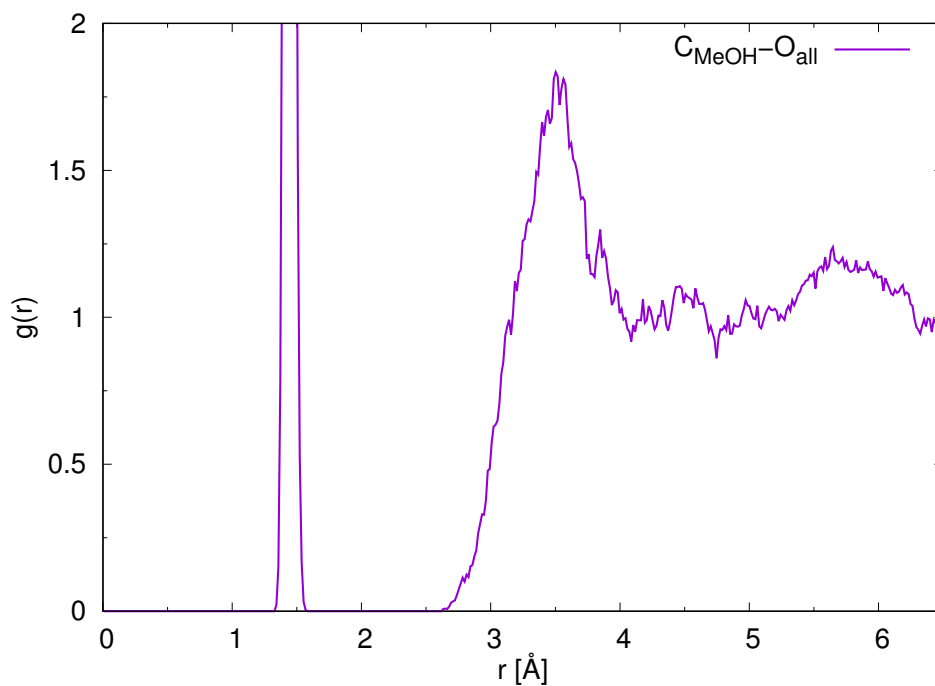

Figure S1: Radial distribution of all oxygen atoms ( $O_{all}$ ) around carbon atom in the methanol ( $C_{MeOH}$ ) from the Abrupt adaptive QM/MM simulation.

## References

- (S1) Moin, S. T.; Hofer, T. S.; Randolph, B. R.; Rode, B. M. *Journal of Computational Chemistry* **2010**, *32*, 886–892.
- (S2) van Erp, T. S.; Jan, M. E. *Chemical Physics Letters* **2001**, *333*, 290–296.
